# Supplementary material
Source: Springer Nature journal article supplement (https://www.springermedizin.de/resource/supplementary/12891_2013_1916_MOESM2_ESM.pdf/9508800)

# Disability of the Arm, Shoulder and Hand

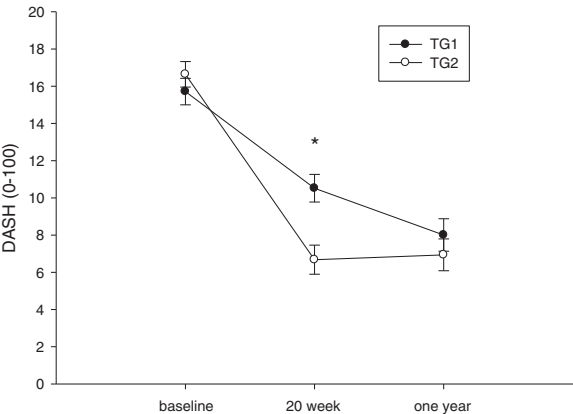

Supplement: MOESM2 [file 9508800]
